# Supplementary material
Source: PubMed Central journal article supplement (PMC6834473)
Supplement: ajcr0009-2140-f10.pdf [file ajcr0009-2140-f10.pdf]

## The promotive role of 25-HC in hepatocellular carcinoma

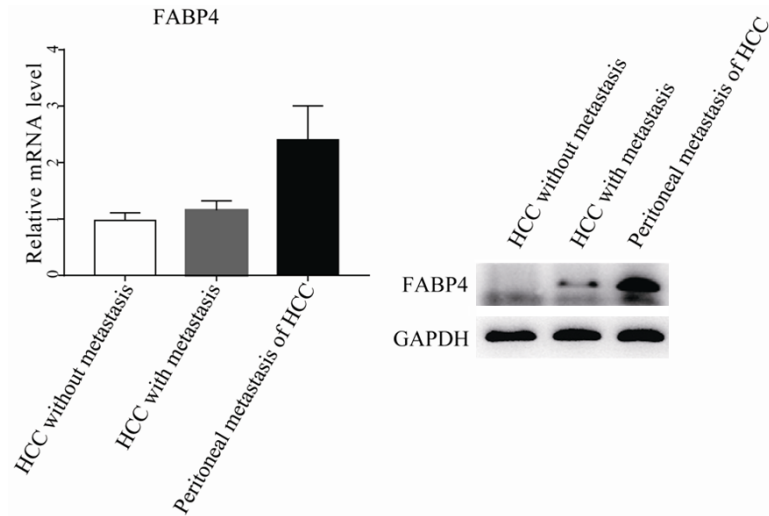

**Supplementary Figure 1.** FABP4 expression was up-regulated in the metastatic tumor sites. BALB/C nude mice were intrahepatic inoculation of  $5 \times 10^6$  HepG2 cells followed by intraperitoneally injection with PBS or 25-HC (10 mg/kg) or 25-HC with BMS-309403 (45 mg/kg). At the end of the experiment, mice were sacrificed, the tumor tissues in the livers of the mice without metastasis, with abdominal metastasis and the metastatic tumor sites were extracted. The mRNA and protein expression of FABP4 was assessed by RT-qPCR and Western blotting, respectively. Results were obtained from 2 independent experiments and are expressed as the means  $\pm$  SEM. Statistical significance was determined by Student's t-test. \* $P < 0.05$ , \*\* $P < 0.01$ , \*\*\* $P < 0.001$ .
